# Supplementary material for: Sesquiterpene Variation in West Australian Sandalwood (Santalum spicatum)
Source: PubMed Central journal article supplement (PMC6152738; doi:10.3390/molecules22060940), 2017-06-06
Supplement: molecules-22-00940-s001.pdf [file molecules-22-00940-s001.pdf]

## Supplemental Figure S1

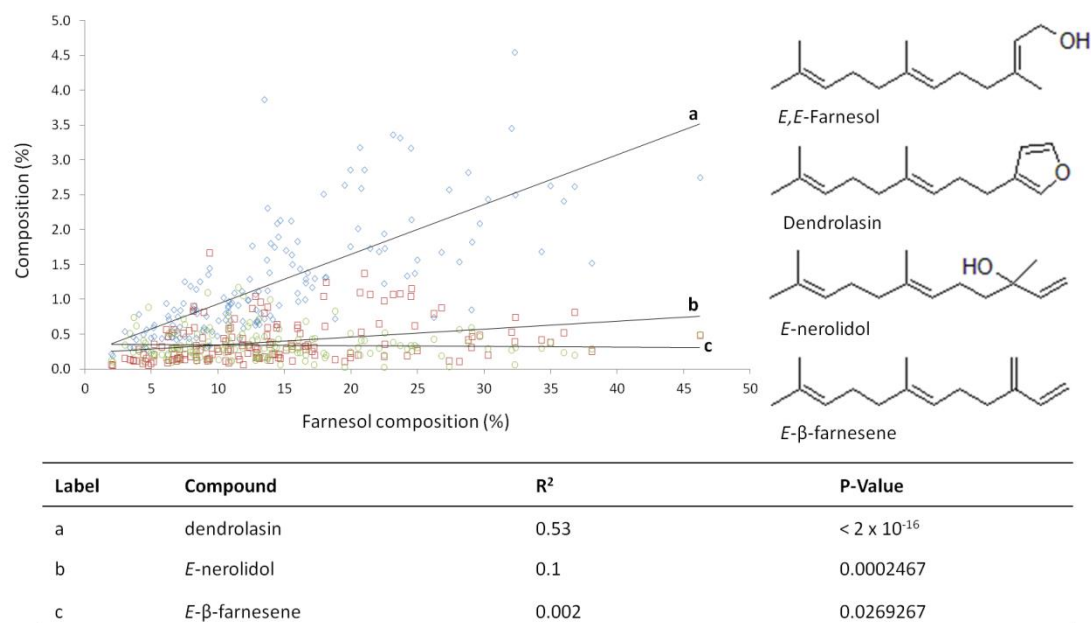

**Figure S1.** The linear correlation between *E,E*-farnesol, dendrolasin, *E*-nerolidol and *E*- $\beta$ -farnesene based on GC-MS analysis 194 heartwood cores of *S. spicatum* trees in natural stands of Western Australia: 152 trees from the south-west (Wheatbelt), 19 trees from the south-east (Goldfields) and 23 trees from the north regions (Carnarvon and Shark Bay) using percent composition data.
